# Supplementary material for: Post-process correction improves the accuracy of satellite PM 2.5 retrievals
Source: Copernicus journal article supplement (doi:10.5194/egusphere-2023-2635), 2024-01-12
Supplement: Supplementary file [file egusphere-2023-2635-AC2-supplement.pdf]

# Post-process correction improves the accuracy of satellite PM<sub>2.5</sub> retrievals - Reply to referees

Andrea Porcheddu, Ville Kolehmainen, Timo Lähivaara, Antti Lipponen

We would like to thank the reviewers for reading carefully the manuscript and giving their comments. Below we reply to each of the comments.

## 1 Answers to reviewer #1

**1.1 There are many researches that focus on using AOD to estimate PM<sub>2.5</sub> through machine learning approaches.**

5 **Compared with them, what is the innovation of this study? I understand that this study corrects the ratio between PM<sub>2.5</sub> and AOD derived from MERRA2 and applies the improved ratio to satellite AOD to estimate surface PM<sub>2.5</sub> concentrations, which is different from other researches that estimate PM<sub>2.5</sub> directly. Although this is a new approach, what is the advantage of this study. Compared with previous researches, can the new approach provide better PM<sub>2.5</sub> estimation?**

10 The novelty of this study is to employ the post process correction where we use machine learning for correcting the geophysical model based AOD-to-PM<sub>2.5</sub> conversion ratio instead of directly predicting the conversion ratio. The rationale for this selection is improved accuracy over the conventional approach of learning the conversion ratio directly. Figure 1 shows the results obtained with the conventional approach of learning directly the AOD-to-PM<sub>2.5</sub> ratio. The  $R^2$ , RMSE and MAE with the proposed post-correction approach (left image) are better than with the conventional direct estimation (right image).

15 **1.2 This exclude the PM<sub>2.5</sub> concentrations that are larger than 80  $\mu\text{g}/\text{m}^3$ . This would reduce the importance of this study as the research community is more interested in heavy polluted scene. The authors excluded that condition that PM<sub>2.5</sub> concentrations that are larger than 80  $\mu\text{g}/\text{m}^3$  due to imbalanced data (only a small set of data with PM<sub>2.5</sub> concentrations that are larger than 80  $\mu\text{g}/\text{m}^3$ ). Can the problem is solved through bagging or other approaches?**

20 The PM<sub>2.5</sub> values beyond 80  $\mu\text{g}/\text{m}^3$  were excluded from the study due to sparsity of high value data in the region of interest (central Europe, 2019) considered in this study. Similar cutoff for high PM<sub>2.5</sub> values has been applied, for example, in Ibrahim et al. (2022)). To address the lack of high PM<sub>2.5</sub> data, one could think of producing synthetic training data using machine learning models such as TVAE (Tabular Variational Auto Encoder) or CTGAN (Conditional Tabular Generative Adversarial Network) (Xu et al., 2019): we tried already to use them to balance the data but they did not improve the results. In future studies

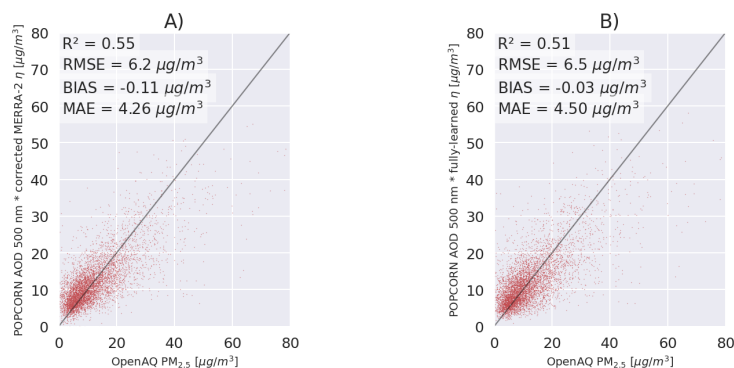

**Figure 1.** A) Post process corrected  $PM_{2.5}$  predictions against OpenAQ  $PM_{2.5}$  measurements. B) Fully-learned NOODLESALAD  $PM_{2.5}$  predictions against OpenAQ  $PM_{2.5}$  measurements.

25 the approach could be extended to more global training data and include data, for example, from India and China, where higher values of  $PM_{2.5}$  exist more frequently.

### 1.3 More information of satellite data is needed. What is the temporal resolution and swath of the sensor?

Two Sentinel-3 satellites currently flying provide revisit times of less than two days for OLCI and less than one day for the SLSTR instrument at equator. Swath width of the OLCI instrument is 1270 km. SLSTR swath width is 1420 km for the nadir view and 750 km for the oblique view. In our study, we base our aerosol information on the official Sentinel-3 Synergy Land data product and the characteristics of that data set matches our satellite overpass data. The information have been added to the manuscript.

### 1.4 This study only demonstrates the validations in Fig. 4. It would be more interesting to show the fitting (training) as well.

35 Fig.2 shows the results on the training set. The metrics are better than on the test set (as it is expected to be), but not very different since we used the early stopping technique as regularization to avoid overfitting on the training set. We remark that in this study we separated part of the available stations to be used as independent validation data for the methods. For operational use, the model could be trained using all the available data in the training and test data sets.

### 1.5 In Fig.4, why monthly mean shows larger bias than instant estimations?

40 It is not strictly necessary that the monthly bias is smaller than the instantaneous bias. We have added mean absolute error (MAE) as an additional metric in the figures. MAE shows improvement for the monthly data over the instantaneous data.

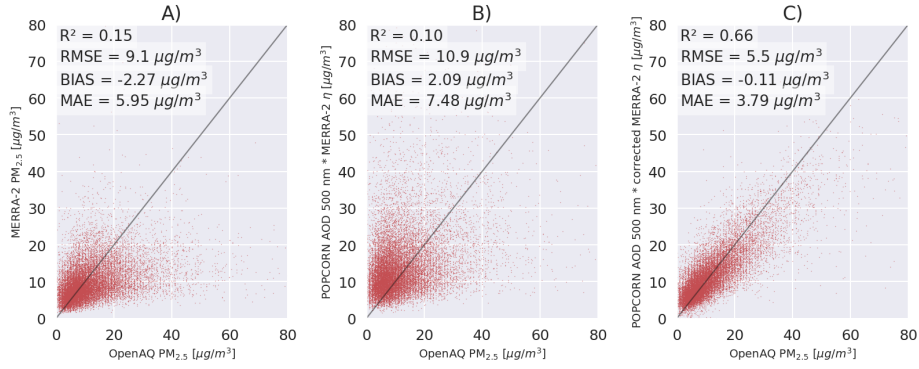

**Figure 2.** A) MERRA-2  $PM_{2.5}$  predictions against OpenAQ  $PM_{2.5}$  measurements per single-overpass. B) Uncorrected NODLESALAD  $PM_{2.5}$  predictions against OpenAQ  $PM_{2.5}$  measurements per single-overpass. C) Corrected NODLESALAD  $PM_{2.5}$  predictions against OpenAQ  $PM_{2.5}$  measurements per single-overpass. These results regard the training set.

### 1.6 Latitude and longitude are missing in the top panels of Figs. 5 and 6.

Latitude and longitude have been added to the panels.

### 1.7 Line 78-80: I cannot understand. More details are needed for the method description.

45 Some OpenAQ stations report 24 hour average  $PM_{2.5}$  every hour based on the last 24 hours.

In this work, we used the 24 hour averages given every hour to estimate hourly  $PM_{2.5}$ . This processing was done station-by-station using a Tikhonov regularized (with regularization parameter value 0.05) least-squares fit to unfold the time integrated data into hourly estimates.

In practice, the hourly  $PM_{2.5}$  estimates were computed using the formula

$$50 \quad PM_{2.5,1h} = (A^T A + \alpha I)^{-1} A^T b, \quad (1)$$

where the system matrix

$$A = \begin{bmatrix} \frac{1}{24} & \frac{1}{24} & \cdots & \frac{1}{24} & 0 & 0 & \cdots & 0 \\ 0 & \frac{1}{24} & \cdots & \frac{1}{24} & \frac{1}{24} & 0 & \cdots & 0 \\ & & & \vdots & & & & \\ 0 & 0 & \cdots & 0 & 0 & 0 & \cdots & \frac{1}{24} \end{bmatrix}, \quad (2)$$

is 24 hour time averaging operator and the data vector

$$b = \begin{bmatrix} PM_{2.5,24h,1} \\ PM_{2.5,24h,2} \\ \vdots \\ PM_{2.5,24h,N} \end{bmatrix}, \quad (3)$$

55

$$PM_{2.5,1h} = \begin{bmatrix} PM_{2.5,1h,24} \\ PM_{2.5,1h,25} \\ \vdots \\ PM_{2.5,1h,N} \end{bmatrix} \quad (4)$$

contain the hourly 24 hour averages  $PM_{2.5,24h,N}$  of the station data and  $\alpha = 0.05$  is the regularization parameter. The solution vector  $PM_{2.5,1h,N}$  contains the unfolded 1 hour  $PM_{2.5}$  at timestep  $N$ , respectively.

We have added this explanation in the revised manuscript.

60 **1.8 Why CALIOP data are used. This is monthly mean data, but  $PM_{2.5}$  and AOD has strong diurnal variation. Can the CALIOP data help to improve  $PM_{2.5}$  estimation?**

We tested the approach without CALIOP data in the training and the result is shown in fig.3 (left image: CALIOP included, right image: without CALIOP). The model which uses CALIOP data results in slightly better accuracy, indicating that use of CALIOP data is warranted.

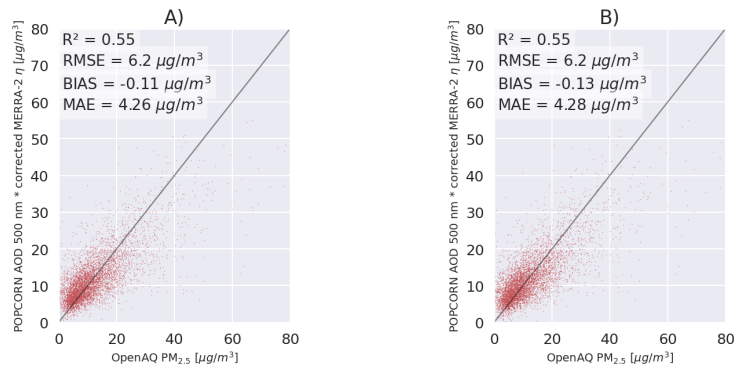

**Figure 3.** A) Corrected NOODLESALAD  $PM_{2.5}$  predictions against OpenAQ  $PM_{2.5}$  measurements per single-overpass (using CALIOP data). B) Corrected NOODLESALAD  $PM_{2.5}$  predictions against OpenAQ  $PM_{2.5}$  measurements per single-overpass (without CALIOP data).

65 **1.9 The unit of RMSE is missing throughout the paper.**

The unit of RMSE has been added to the paper.

**2 Answers to reviewer #2**

**2.1 Abstract: The study lacks major conclusions and quantitative descriptive results.**

The abstract has been modified as follows (extension highlighted in red):

70 Estimates of  $PM_{2.5}$  levels are crucial for monitoring air quality and studying the epidemiological impact of air quality on the population. Currently, the most precise measurements of  $PM_{2.5}$  are obtained from ground stations, resulting in limited spatial coverage. In this study, we consider satellite-based  $PM_{2.5}$  retrieval, which involves conversion of high-resolution satellite retrieval of Aerosol Optical Depth (AOD) into high-resolution  $PM_{2.5}$  retrieval. To improve the accuracy of the AOD to  $PM_{2.5}$  conversion, we employ the machine learning based post-process correction to correct the AOD-to-PM conversion ratio derived  
75 from Modern-Era Retrospective analysis for Research and Applications, Version 2 (MERRA-2) reanalysis model data. The post-process correction approach utilizes a fusion and downscaling of satellite observation and retrieval data, MERRA-2 reanalysis data, various high resolution geographical indicators, meteorological data and ground station observations for learning a predictor for the approximation error in the AOD to  $PM_{2.5}$  conversion ratio. The corrected conversion ratio is then applied to estimate  $PM_{2.5}$  levels given the high-resolution satellite AOD retrieval data derived from Sentinel-3 observations. **The region of  
80 study is central Europe during the year 2019. Our model produces  $PM_{2.5}$  estimates with a spatial resolution of 100 meters at satellite overpass times with  $R^2 = 0.55$  and  $RMSE = 6.2 \mu g/m^3$ . The corresponding metrics for monthly averages are  $R^2 = 0.72$  and  $RMSE = 3.7 \mu g/m^3$ .** Additionally, we have incorporated an ensemble of neural networks to provide error envelopes for machine learning related uncertainty in the  $PM_{2.5}$  estimates. **The proposed approach can produce accurate high resolution  $PM_{2.5}$  data that can be very useful for air quality monitoring, emission regulation and epidemiological studies.**

85 **2.2 The introduction is very short and lacks a comprehensive review of numerous previous studies on converting AOD to  $PM_{2.5}$  using machine learning models.**

The introduction has been modified as follows (extension highlighted in red):

Poor air quality is one of the most serious environmental health risks of our time. In September 2021, the World Health Organization (WHO) released Global Air Quality Guidelines, revealing clear evidence of the damage air pollution inflicts on  
90 human health at even lower concentrations than previously understood (World Health Organization, 2021). WHO estimates that exposure to air pollution causes 7 million premature deaths every year. A key indicator in monitoring air quality and epidemiological studies is the  $PM_{2.5}$  parameter, which is the dry mass concentration of fine particulate matter with an aerodynamic diameter of less than 2.5 micrometers (micrograms of particulate matter per cubic meter of air). Fine particulate matter originates from vehicle emissions, coal burning, and industrial emissions, among many other human and natural sources.  
95 Epidemiological studies link long exposures to high  $PM_{2.5}$  levels to many severe illnesses, such as stroke and cardiovascular

and respiratory diseases (e.g. Pope and Dockery, 2006; Cohen et al., 2017). On a global scale, the magnitude of the  $PM_{2.5}$  exposure-related risk for human health is enormous as more than 90% of the world's population lives in areas with annual mean  $PM_{2.5}$  levels exceeding the new WHO 2021 air quality guideline of 5 micrograms per cubic meter (Health Effects Institute, 2019).

100 While the knowledge of the health effects of pollution increases continuously, the epidemiological estimates still have significant uncertainties due to the lack of accurate global air pollution data (Hammer et al., 2020). Networks of ground-based observation stations produce accurate pointwise observations of  $PM_{2.5}$  and certain chemical components such as ozone, sulfur dioxide and nitrogen dioxide. These ground station measurements produce relatively accurate data, but the networks consist of only a few thousand irregularly located observation stations, mainly in developed countries, leading to the insufficient spatial  
105 coverage of the  $PM_{2.5}$  data. To better monitor and understand air quality and pollution sources near real-time global observations of air quality are needed. The only way to get spatially resolved air quality data is to utilize satellite retrievals.

Satellite retrievals of  $PM_{2.5}$  are often based on satellite AOD retrievals and AOD-to-PM conversion ratio (Health Effects Institute, 2019; van Donkelaar et al., 2013; Zhang and Kondragunta, 2021; Geng et al., 2015). AOD is a columnar optical quantity, whereas  $PM_{2.5}$  is the mass concentration of dry aerosol particles at some single point, typically at the surface level.  
110 Many factors affect the AOD-to-PM conversion ratio, including the aerosol vertical extinction profile, aerosol type and size distribution, and relative humidity. These factors are typically unavailable from a single data source, such as data provided by the instruments onboard a satellite, so a simulation-model-based AOD-to-PM ratio is often used. The simulation-model-based AOD-to-PM conversion ratio is typically computed based on meteorology, chemical transport models (CTM) and auxiliary satellite data such as lidar-based aerosol vertical profiles. The  $PM_{2.5}$  retrieval at a given location and time is then calculated as a  
115 product of the retrieved satellite AOD and the AOD to  $PM_{2.5}$  ratio. The current state-of-the-art  $PM_{2.5}$  retrieval algorithm also contains a post-processing step where the retrieved spatial  $PM_{2.5}$  estimate is fitted to the ground-based  $PM_{2.5}$  station data by a linear geographically weighted regression (van Donkelaar et al., 2016).

Many previous studies use machine learning techniques to convert AOD to  $PM_{2.5}$  levels. In particular, (Ibrahim et al., 2022) used a variant of Random Forest called Extremely Randomised Trees (ET) to estimate  $PM_{2.5}$  across Europe. (Stafoggia et al.,  
120 2019; Schneider et al., 2020) used Random Forest regressors in a multi-stage approach to estimate  $PM_{2.5}$  at ground stations when only  $PM_{10}$  measurements were available, to impute AOD values when not accessible and to finally predict  $PM_{2.5}$  values across Italy and Great Britain. (Handschuh et al., 2023) considered multiple Random Forest models to evaluate  $PM_{2.5}$  levels across Germany using 4 different AOD datasets.

In this paper, we propose a novel approach for high-resolution satellite-based retrieval of  $PM_{2.5}$ . While the previous studies  
125 use machine learning to learn the AOD to  $PM_{2.5}$  conversion directly, we take a novel approach where we train the model to predict the approximation error in the geophysical model based conversion ratio. Our approach retrieves  $PM_{2.5}$  at the spatial resolution of 100 m. It is based on the machine learning post-process correction approach, which we developed for the correction of approximation errors in satellite retrievals (Lipponen et al., 2021) and employed for high-resolution spectral aerosol optical depth (AOD) retrieval (POPCORN AOD) from SENTINEL-3 SYNERGY data (Lipponen et al., 2022). In our algorithm  
130 development work, we take the spectral, high-resolution Sentinel-3 POPCORN AOD (Lipponen et al., 2022) as the starting point.

Our  $PM_{2.5}$  retrieval is based on the AOD-to- $PM_{2.5}$  conversion ratio applied to the POPCORN AOD. The AOD-to- $PM_{2.5}$  ratio is estimated by machine learning techniques utilizing a fusion of collocated ground station-based in-situ  $PM_{2.5}$  data, MERRA-2 reanalysis model AOD and  $PM_{2.5}$  data, spectral AERONET AOD, satellite-observed spectral top-of-atmosphere reflectances, meteorology data and various high-resolution geographical indicators representing, for example, population density and land surface elevation. Utilizing these data, we employ the post-process correction approach to the estimation of AOD-to- $PM_{2.5}$  ratio (Lipponen et al., 2021, 2022; Taskinen et al., 2022) and then the high-resolution  $PM_{2.5}$  retrieval is obtained as the product of the post-process corrected AOD-to- $PM_{2.5}$  ratio and POPCORN AOD. By using an ensemble of neural networks, we can also provide error envelopes for the machine learning related uncertainty in the  $PM_{2.5}$  estimates. The approach is tested with Sentinel-3 data from central Europe in 2019.

140 **2.3 The use of MERRA2-2 for calculating  $PM_{2.5}$  is criticized for its inaccuracies and omission of certain species like Nitrate. It is suggested to consider using GEOS-CF data, which provides  $PM_{2.5}$  simulations at a higher resolution of 0.25 degrees.**

We thank the referee for the suggestion. We agree that GEOS-CF would be a suitable and good model data to consider in our methodology. Our methodology developed is not restricted to any single model or satellite data. Some criteria in selecting the model data for our work were long time series and widely used model in scientific literature and we therefore ended up selecting MERRA-2. In our future work, we will consider using GEOS-CF data as it has somewhat better spatial accuracy and more relevant species for air quality applications.

**2.4 The spatial resolution of high-resolution indicators such as roads and nighttime lights needs clarification.**

- NASA Black Marble Night Lights: We use the 500 meter resolution data.
- 150 – OpenStreetMap roads: The original data is vector data with a typical accuracy of orders of meters. We have re-projected the OpenStreetMap road data to 100 meter resolution before use.

We have added the resolutions used to the revised manuscript.

**2.5 The excessive number of variables selected raises questions about their relevance and contribution to the network model. It would be beneficial to employ importance analysis methods to identify and eliminate redundant variables. This process will streamline the model and improve its efficiency and interpretability.**

We used SHAP analysis (Lundberg and Lee (2017)) to estimate the feature importance after model training. A bar plot can be seen in fig.4 for the first 26 features found with the SHAP analysis. Table 1 contains all the input variables listed by importance (SHAP value). Since all the variables had non-negligible SHAP values, indicating some information content in them, we decided to keep them all. The input variable table in the manuscript has been modified so that now the variables are listed in order of importance by the SHAP values.

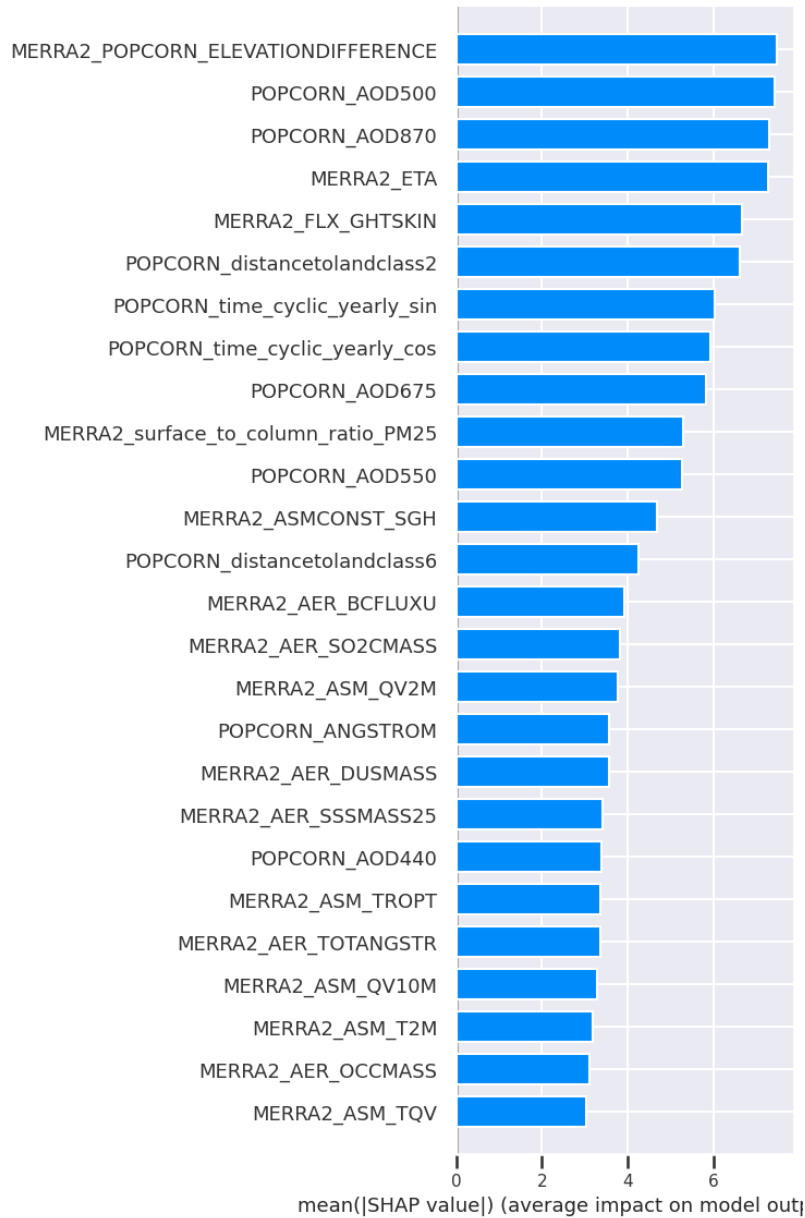

**Figure 4.** Bar plot of the SHAP values for the first 26 input variables in order of importance.

**2.6 Figure 3: It is unclear how the training and validation stations are divided. Additionally, the proximity of stations may lead to correlation issues, affecting the independence of training and testing samples spatially.**

We are not the first ones to use site-validation, please see the review of different validation methods used in the literature Tang et al. (2024). Essentially we divided randomly the stations into training set, validation set and test set, then used the related data



165 accordingly. For what regards the correlation issues, there should be only a minimal effect since we are operating at resolution of 100 m and there are not two or more stations in the same pixel.

**2.7 Section 3.4: The rationale for choosing the neural network model over other more powerful machine learning and deep learning models is not provided. The advantages of this model should be discussed.**

Using a fully connected neural network compared to other common models in  $PM_{2.5}$  prediction like random forest is very  
170 suitable in the case one is working with assumption of independent pixels and a high number of data samples and features. In this case, our study is limited to the chosen ROI and period of time (2019) so we have roughly 20000 points in the training set: our plan is to extend the ROI and the period of time in future studies so to have more data in the training set, where the fully connected neural network should show all its learning capability. Comparing the fully connected neural network to other deep learning models, we think it is the most suitable architecture for the task at hand since we are dealing with tabular data and a fair  
175 amount of features. One could for example think of using a convolutional neural network and reorganizing the data samples into appropriate matrices but still the number of features is small and we don't know if we would benefit deploying a convolutional network (there's no computational burden to justify this approach and the fully connected neural network should be able to find proper representations of the input data in its hidden layers).

**2.8 Figure 4: While the accuracy has improved, the correlation remains relatively low (only 0.63), compared to  
180 previous studies achieving higher accuracy with AI (R2 higher than 0.8). The significance of the study is questioned, and comparison with previous studies to assess improvement is recommended.**

The  $R^2$  coefficient is low compared to other studies but we should compare our manuscript to papers who deal with, for example, the same ROI, spatial resolution and study time period. Our RMSE is comparable to other studies that consider European countries or similar ROI (Schneider et al. (2020); Ibrahim et al. (2022); Handschuh et al. (2023)). The  $R^2$  coefficient is low  
185 but the number of data samples at hand is low too: as mentioned before, we are considering the year 2019 and compared, for example, to Ibrahim et al. (2022) we have 10% of data. Our ensemble of fully connected neural networks would benefit from having more data and the metrics would improve further. Also the data and the preprocessing choices are different, so the studies are not directly comparable.

|                                     |                                |                                          |
|-------------------------------------|--------------------------------|------------------------------------------|
| MERRA2_POPCORN_ELEVATIONDIFFERENCE  | POPCORN_AOD500                 | POPCORN_AOD870                           |
| MERRA2_ETA                          | MERRA2_FLX_GHTSKIN             | POPCORN_distancetolandclass2             |
| POPCORN_time_cyclic_yearly_sin      | POPCORN_time_cyclic_yearly_cos | POPCORN_AOD675                           |
| MERRA2_surface_to_column_ratio_PM25 | POPCORN_AOD550                 | MERRA2_ASMCONST_SGH                      |
| POPCORN_distancetolandclass6        | MERRA2_AER_BCFLUXU             | MERRA2_AER_SO2CMASS                      |
| MERRA2_ASM_QV2M                     | POPCORN_ANGSTROM               | MERRA2_AER_DUSMASS                       |
| MERRA2_AER_SSSMASS25                | POPCORN_AOD440                 | MERRA2_ASM_TROPT                         |
| MERRA2_AER_TOTANGSTR                | MERRA2_ASM_QV10M               | MERRA2_ASM_T2M                           |
| MERRA2_AER_OCCMASS                  | MERRA2_ASM_TQV                 | MERRA2_FLX_QLML                          |
| MERRA2_AER_SUFLUXV                  | MERRA2_FLX_USTAR               | MERRA2_AER_SO4CMASS                      |
| POPCORN_distancetolandclass17       | MERRA2_AER_DUCMASS             | MERRA2_AER_BCSMASS                       |
| MERRA2_AER_BCSCATAU                 | MERRA2_AER_DUEXTTAU            | MERRA2_FLX_EFLUX                         |
| MERRA2_AER_SO4SMASS                 | MERRA2_FLX_EVAP                | MERRA2_FLX_NIRDR                         |
| MERRA2_FLX_HFLUX                    | POPCORN_ASTERDEM               | MERRA2_AER_SUANGSTR                      |
| MERRA2_ASM_TROPPB                   | MERRA2_AER_BCFLUXV             | MERRA2_FLX_TLML                          |
| MERRA2_FLX_QSTAR                    | POPCORN_time_cyclic_daily_sin  | MERRA2_AER_DUSCATAU                      |
| MERRA2_FLX_PBLH                     | POPCORN_distancetolandclass7   | POPCORN_distancetolandclass12            |
| MERRA2_AER_OCSCATAU                 | MERRA2_AER_TOTEXTTAU           | POPCORN_distancetolandclass15            |
| MERRA2_ASM_TROPPV                   | MERRA2_SURFACERH               | MERRA2_FLX_RHOA                          |
| MERRA2_AER_BCEXTTAU                 | MERRA2_FLX_FRCLS               | MERRA2_AER_DUEXTT25                      |
| MERRA2_ASM_T10M                     | MERRA2_ASM_TS                  | MERRA2_FLX_SPEED                         |
| MERRA2_AER_BCANGSTR                 | MERRA2_AER_DUSCAT25            | MERRA2_AER_OCFLUXU                       |
| MERRA2_CTMCONST_FRLANDICE           | MERRA2_AER_DUCMASS25           | MERRA2_AER_OCEXTTAU                      |
| MERRA2_FLX_FRCAN                    | MERRA2_ASMCONST_FRLAND         | MERRA2_AER_SSCMASS                       |
| MERRA2_AER_TOTSCATAU                | MERRA2_AER_BCCMASS             | MERRA2_CTMCONST_FRACI                    |
| MERRA2_AER_DUSMASS25                | POPCORN_distancetolandclass16  | POPCORN_CALIOP_MASK_AOD_90_Percent_Below |
| POPCORN_time_cyclic_daily_cos       | POPCORN_distancetolandclass4   | MERRA2_AER_DUANGSTR                      |
| MERRA2_FLX_SPEEDMAX                 | MERRA2_CTMCONST_FRLAND         | MERRA2_FLX_HLML                          |
| MERRA2_AER_DUFLUXV                  | MERRA2_AER_OCANGSTR            | MERRA2_FLX_TAU                           |
| MERRA2_FLX_FRCCN                    | MERRA2_PM25                    | MERRA2_ASMCONST_FRLAKE                   |
| POPCORN_distancetolandclass8        | MERRA2_AER_SSFLUXV             | MERRA2_AER_SUFLUXU                       |
| MERRA2_FLX_CDQ                      | POPCORN_distancetolandclass13  | MERRA2_FLX_TSTAR                         |
| MERRA2_FLX_CN                       | MERRA2_ASM_V50M                | MERRA2_AER_SSSCATAU                      |
| MERRA2_FLX_QSH                      | MERRA2_FLX_Z0H                 | MERRA2_ASM_PS                            |
| MERRA2_AER_SSEXTTAU                 | MERRA2_FLX_TCZPBL              | MERRA2_AER_OCSMASS                       |
| MERRA2_FLX_TSH                      | POPCORN_distancetolandclass3   | MERRA2_SURFACEELEVATION                  |
| MERRA2_ASM_TROPQ                    | MERRA2_FLX_CDH                 | MERRA2_FLX_PGENTOT                       |
| MERRA2_ASM_U10M                     | MERRA2_FLX_ULML                | MERRA2_ASM_TOX                           |
| MERRA2_AER_DMSSMASS                 | POPCORN_distancetolandclass1   | POPCORN_distancetolandclass14            |
| MERRA2_FLX_TAU                      | MERRA2_ASMCONST_FRLANDICE      | MERRA2_AER_SUSCATAU                      |
| MERRA2_AER_DUFLUXU                  | POPCORN_distancetolandclass10  | MERRA2_FLX_PREVTOT                       |
| MERRA2_CTMCONST_FROCEAN             | MERRA2_ASM_TQL                 | MERRA2_ASM_U2M                           |
| MERRA2_ASM_DISP                     | MERRA2_FLX_PRECTOT             | MERRA2_AER_SO2SMASS                      |
| MERRA2_FLX_CDM                      | MERRA2_FLX_Z0M                 | MERRA2_ASM_windspeed                     |
| POPCORN_distancetolandclass11       | MERRA2_FLX_DISP                | MERRA2_AER_OCFLUXV                       |
| MERRA2_FLX_PRECTOTCORR              | MERRA2_ASM_TROPPT              | MERRA2_FLX_PRECLSC                       |
| MERRA2_FLX_BSTAR                    | MERRA2_ASM_TO3                 | POPCORN_CALIOP_MASK_AOD_63_Percent_Below |
| MERRA2_FLX_PRECCON                  | MERRA2_ASM_TQI                 | MERRA2_ASMCONST_FROCEAN                  |
| MERRA2_CTMCONST_PHIS                | POPCORN_distancetolandclass5   | MERRA2_CTMCONST_FRLAKE                   |
| MERRA2_FLX_TAUGWX                   | MERRA2_FLX_PRECANV             | MERRA2_ASM_V2M                           |
| MERRA2_ASMCONST_PHIS                | MERRA2_FLX_NIRDF               | POPCORN_distancetolandclass9             |
| MERRA2_ASM_SLP                      | POPCORN_BlackMarble            | POPCORN_distancetoroad_upwind            |
| MERRA2_AER_SSANGSTR                 | MERRA2_FLX_VLML                | MERRA2_AER_SSSCAT25                      |
| MERRA2_ASM_winddirection            | MERRA2_FLX_TAUGWY              | MERRA2_AER_SFLUXU                        |
| MERRA2_AER_SUEXTTAU                 | MERRA2_ASM_V10M                | MERRA2_AER_SSCMASS25                     |
| MERRA2_FLX_PRECSNO                  | MERRA2_AER_SSEXTT25            | MERRA2_AER_DMSSMASS                      |
| MERRA2_FLX_RISFC                    | MERRA2_AER_SSSMASS             | MERRA2_ASM_U50M                          |
| MERRA2_FLX_FRSEAICE                 |                                |                                          |

**Table 1.** List of input variables used in our model ordered by SHAP value (from left to right and from top to bottom).

## References

- 190 Cohen, A. J., Brauer, M., Burnett, R., Anderson, H. R., Frostad, J., Estep, K., et al.: Estimates and 25-year trends of the global burden of disease attributable to ambient air pollution: an analysis of data from the Global Burden of Diseases Study 2015, *The Lancet*, 389, 1907–1918, 2017.
- Geng, G., Zhang, Q., Martin, R., Donkelaar, A., Huo, H., CHE, H., Lin, J., and He, H.: Estimating long-term PM<sub>2.5</sub> concentrations in China using satellite-based aerosol optical depth and a chemical transport model, *Remote Sensing of Environment*, 166, 195 <https://doi.org/10.1016/j.rse.2015.05.016>, 2015.
- Hammer, M. S., van Donkelaar, A., Li, C., Lyapustin, A., Sayer, A. M., Hsu, N. C., Levy, R. C., Garay, M. J., Kalashnikova, O. V., Kahn, R. A., et al.: Global estimates and long-term trends of fine particulate matter concentrations (1998–2018), *Environmental Science & Technology*, 54, 7879–7890, 2020.
- Handschuh, J., Erbertseder, T., and Baier, F.: Systematic Evaluation of Four Satellite AOD Datasets for Estimating PM<sub>2.5</sub> Using a Random Forest Approach, *Remote Sensing*, 15, <https://doi.org/10.3390/rs15082064>, 2023.
- 200 Health Effects Institute: State of global air 2019, 2019.
- Ibrahim, S., Landa, M., Pešek, O., Brodský, L., and Halounová, L.: Machine Learning-Based Approach Using Open Data to Estimate PM<sub>2.5</sub> over Europe, *Remote Sensing*, 14, <https://doi.org/10.3390/rs14143392>, 2022.
- Lipponen, A., Kolehmainen, V., Kolmonen, P., Kukkurainen, A., Mielonen, T., Sabater, N., Sogacheva, L., Virtanen, T. H., and Arola, A.: 205 Model-enforced post-process correction of satellite aerosol retrievals, *Atmospheric Measurement Techniques*, 14, 2981–2992, 2021.
- Lipponen, A., Reinval, J., Väisänen, A., Taskinen, H., Lähivaara, T., Sogacheva, L., Kolmonen, P., Lehtinen, K., Arola, A., and Kolehmainen, V.: Deep-learning-based post-process correction of the aerosol parameters in the high-resolution Sentinel-3 Level-2 Synergy product, *Atmospheric Measurement Techniques*, 15, 895–914, 2022.
- Lundberg, S. M. and Lee, S.: A unified approach to interpreting model predictions, *CoRR*, abs/1705.07874, <http://arxiv.org/abs/1705.07874>, 210 2017.
- Pope, C. A. I. and Dockery, D. W.: Health Effects of Fine Particulate Air Pollution: Lines that Connect, *Journal of the Air & Waste Management Association*, 56, 709–742, <https://doi.org/10.1080/10473289.2006.10464485>, 2006.
- Schneider, R., Vicedo-Cabrera, A. M., Sera, F., Masselot, P., Stafoggia, M., de Hoogh, K., Kloog, I., Reis, S., Vieno, M., and Gasparri, A.: A Satellite-Based Spatio-Temporal Machine Learning Model to Reconstruct Daily PM<sub>2.5</sub> Concentrations across Great Britain, *Remote Sensing*, 12, <https://doi.org/10.3390/rs12223803>, 2020.
- 215 Stafoggia, M., Bellander, T., Bucci, S., Davoli, M., de Hoogh, K., de' Donato, F., Gariazzo, C., Lyapustin, A., Michelozzi, P., Renzi, M., Scortichini, M., Shtein, A., Viegi, G., Kloog, I., and Schwartz, J.: Estimation of daily PM<sub>10</sub> and PM<sub>2.5</sub> concentrations in Italy, 2013–2015, using a spatiotemporal land-use random-forest model, *Environment International*, 124, 170–179, <https://doi.org/https://doi.org/10.1016/j.envint.2019.01.016>, 2019.
- 220 Tang, D., Zhan, Y., and Yang, F.: A review of machine learning for modeling air quality: Overlooked but important issues, *Atmospheric Research*, 300, 107 261, <https://doi.org/https://doi.org/10.1016/j.atmosres.2024.107261>, 2024.
- Taskinen, H., Väisänen, A., Hatakka, L., Virtanen, T. H., Lähivaara, T., Arola, A., Kolehmainen, V., and Lipponen, A.: High-Resolution Post-Process Corrected Satellite AOD, *Geophysical Research Letters*, 49, e2022GL099 733, 2022.
- van Donkelaar, A., Martin, R. V., Spurr, R. J., Drury, E., Remer, L. A., Levy, R. C., and Wang, J.: Optimal estimation for global ground-level 225 fine particulate matter concentrations, *Journal of Geophysical Research: Atmospheres*, 118, 5621–5636, 2013.

- van Donkelaar, A., Martin, R. V., Brauer, M., Hsu, N. C., Kahn, R. A., Levy, R. C., Lyapustin, A., Sayer, A. M., and Winker, D. M.: Global Estimates of Fine Particulate Matter using a Combined Geophysical-Statistical Method with Information from Satellites, Models, and Monitors, *Environmental Science & Technology*, 50, 3762–3772, <https://doi.org/10.1021/acs.est.5b05833>, 2016.
- World Health Organization: New WHO Global Air Quality Guidelines aim to save millions of lives from air pollution, <https://www.who.int/news/item/22-09-2021-new-who-global-air-quality-guidelines-aim-to-save-millions-of-lives-from-air-pollution>, [Online; accessed 12-April-2023], 2021.
- Xu, L., Skoularidou, M., Cuesta-Infante, A., and Veeramachaneni, K.: Modeling Tabular data using Conditional GAN, 2019.
- Zhang, H. and Kondragunta, S.: Daily and Hourly Surface PM<sub>2.5</sub> Estimation From Satellite AOD, *Earth and Space Science*, 8, e2020EA001 599, <https://doi.org/https://doi.org/10.1029/2020EA001599>, e2020EA001599 2020EA001599, 2021.
